# Supplementary material
Source: publisher site journal article supplement (https://kjim.org/upload/media/kjim-2025-224-Supplementary-Fig-4.pdf)
Supplement: Supplementary file 1 [file kjim-2025-224-Supplementary-Fig-4.pdf]

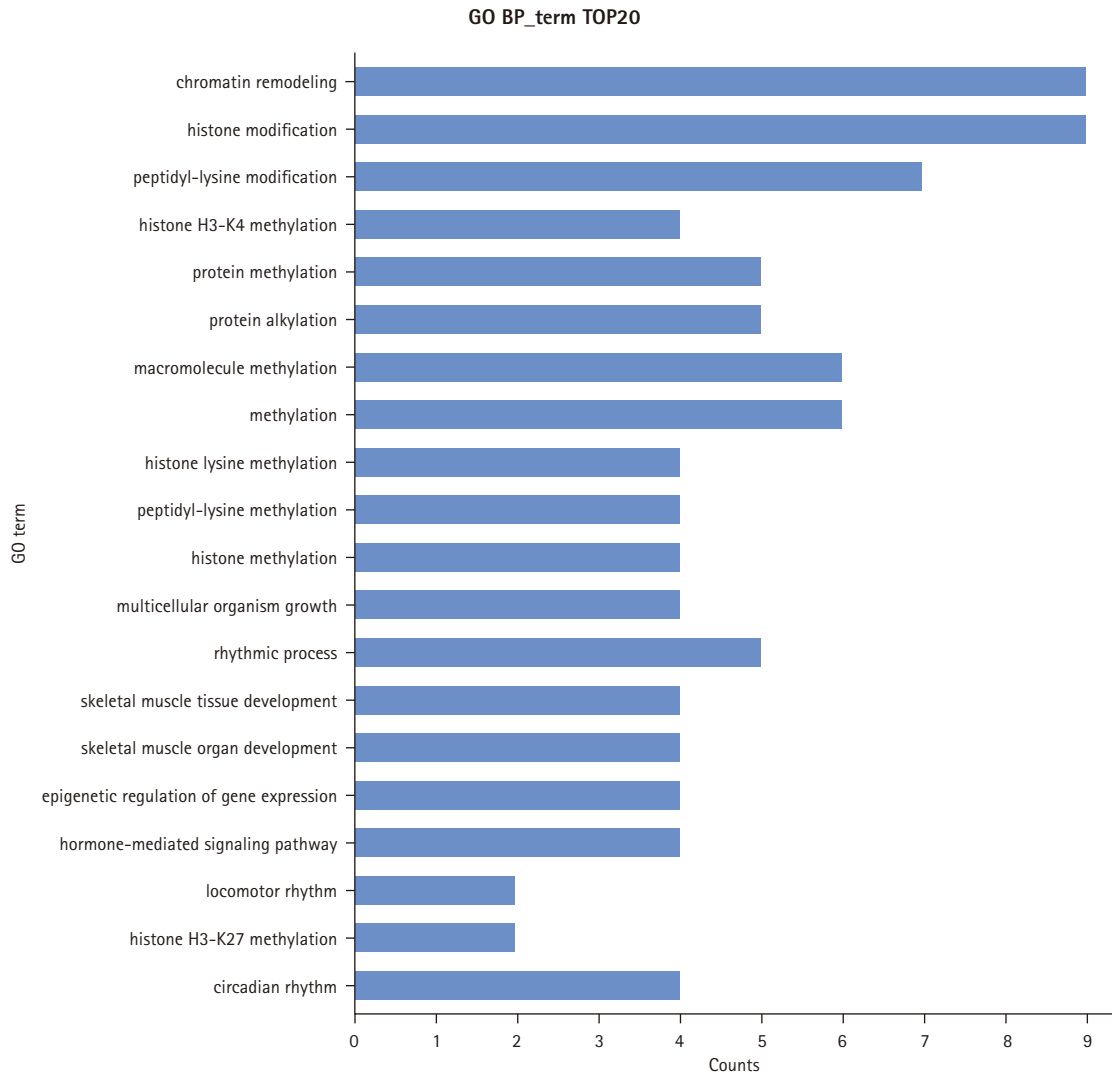

**Supplementary Figure 4.** Top 20 GO analysis terms regarding the biological processes in patients with high DU. GO, gene ontology; DU, diffuse uptake; BP, biological process.
